# Supplementary material for: Involvement of Arabidopsis Multi-Copper Oxidase-Encoding LACCASE12 in Root-to-Shoot Iron Partitioning: A Novel Example of Copper-Iron Crosstalk
Source: Frontiers journal article supplement (doi:10.3389/fpls.2021.688318), 2021-10-11
Supplement: Data_Sheet_1.zip [file Data_Sheet_1.zip]

|        |   |                                                                       |    |
|--------|---|-----------------------------------------------------------------------|----|
| ScFET3 | 1 | MTN-----ALLSIAVL-----LF                                               | 13 |
| LAC1   | 1 | MEN-----LGFLIIST--FILLFTTL-----L                                      | 20 |
| LAC2   | 1 | MVT-----WVLNLYLLV--AFLFAISY-----NI                                    | 21 |
| LAC3   | 1 | MES-----FRRFS--LLSFIALA-----YF                                        | 19 |
| LAC4   | 1 | MGS-----HMVWFLF--LVSEFFSV-----F                                       | 18 |
| LAC5   | 1 | MDV---TKSLLCFISFV--AFLLFSSV-----22                                    |    |
| LAC6   | 1 | MTS---SAVPSLFRIS--FLLFTLQV-----MN                                     | 23 |
| LAC7   | 1 | MEG-VRVP-----IACALILL-----AI                                          | 17 |
| LAC8   | 1 | MPR-----LHHYLS--NQAFLVLL-----LF                                       | 19 |
| LAC9   | 1 | MPR-----VHHSLS--NQAFLVLL-----LF                                       | 19 |
| LAC10  | 1 | M-----VFPIR--ILVLFALL-----AF                                          | 16 |
| LAC11  | 1 | MKMG-----FLF--LFCYLLAF-----LG                                         | 17 |
| LAC12  | 1 | MTT-----VHTFS--ILLFFCSL-----FS                                        | 18 |
| LAC13  | 1 | MEQ-----LRPF--FLLLLAI-----FV                                          | 15 |
| LAC14  | 1 | MEFKLNIPNTI IKTLQT--IVFFLFVL-----LA                                   | 27 |
| LAC15  | 1 | MSH-----SFFNFLFI-----SL                                               | 13 |
| LAC16  | 1 | M-----1                                                               |    |
| LAC17  | 1 | MAL-----QLL--LAVFSCVL-----LL                                          | 16 |
| AO     | 1 | MMPRKRSSDTVHVFNLM--VLCFIALF-----FS                                    | 27 |
| LPR1   | 1 | MES-----LLCRRRIKR--VMVLIIADTWLRSTCG---ELEDQLFEVGKLMKFVDDLPMMPRLYGFNVS | 60 |
| LPR2   | 1 | MEP-----SRRRMTRDMLLLIVTMAWLVTGDEGGIKQEERLFNLGKLEMFVDKLPHPITLHG        | 62 |

|        |    |                                                                         |     |
|--------|----|-------------------------------------------------------------------------|-----|
| ScFET3 | 14 | SMSLSLAQAETHTFENWTTGWY----RNVDGL-KSRPVITCNGQFFWPDITVNGKDRVQIYLTNGMNNTN- | 77  |
| LAC1   | 21 | PYSSASTTRRFHENVEW-----KKVTRLCHTKQLLTVNGQYPGPTVAVHEGDIVEIKVTNR-IAHN-     | 80  |
| LAC2   | 22 | DAASAGITRHYQFDIQL-----KNITRLCKTKTIVTVNGKFPGPRTVAREGDNLOIKVVNH-VSNN-     | 81  |
| LAC3   | 20 | AFLASAEHHVHQEVITP-----TPVKRLCORTHQSTIVNGQYPGPTLVVRNGDSLAIITVINR-ARYN-   | 79  |
| LAC4   | 19 | PAPSESMVRHYKENVVM-----KNVTRLCSSKPTVTVNGRYPGPTIYAREDDTLLIKVVNH-VKYN-     | 78  |
| LAC5   | 22 | --AEANKAHHHEFIIQA-----TKVKRLCETHNSITVNGMFFPGPMLVVNNGDTLVVKVINR-ARYN-    | 80  |
| LAC6   | 24 | IGRIGAATRFYQFKVQT-----IRLTRLCQTNEIVTVNKKFPGPAISAQEDDRIVIKVINM-TPYN-     | 83  |
| LAC7   | 18 | SSITSASIVEHTENVQN-----LTVSRLCRKQVITVNGSLPGPTIRVKEGDSLVIHVLNH-SPHN-      | 77  |
| LAC8   | 20 | SSIASAIVVEHVLHIQD-----VVVKPLCKEQIIPAANGSLPGPTINVREGDTLVVNVINN-STYN-     | 79  |
| LAC9   | 20 | SSIASAIVVEHVLHVVD-----VVVTPLCKEQMPIVNGSLPGPTINVREGDTLVVHVINK-STYN-      | 79  |
| LAC10  | 17 | PACVHGAIKRYTFENVVT-----KQVTRICSTKQIVTVNGKFPGPTIYANEDDTILVNVVNN-VKYN-    | 76  |
| LAC11  | 18 | YSPVDAAVKKYQEDVQV-----KNISRICNAKPIVTVNGMFFPGPTVYAREGDRVIINVTNH-VQYN-    | 77  |
| LAC12  | 19 | ASLIIIAKVQHHDVEVIQE-----TPVKRLCKTRNAITVNGMFFPGPTLEVNNGDTLEVKKVHN-ARYN-  | 78  |
| LAC13  | 16 | ASLVNAEVHFHEFVIQE-----TPVKRLCRVHNSITVNGQFPGPTLEVNRGDSLVTITAINK-ARYN-    | 75  |
| LAC14  | 28 | FQIAEAEIHHTFKIKS-----KAYTRLCNTNKILTVNGEFPGPTLKAYRGDKLIVNVINN-ANYN-      | 87  |
| LAC15  | 14 | FLYNNCIAHHYTFETVRE-----VPYTKLCSTKAILTVNSQFPGPILIKVHGDITIVNVQNR-ASEN-    | 73  |
| LAC16  | 1  | -----TNTTKLCSSKPIVTVNGQFPGPTIVAREGDTILIKVVNH-VKYN-                      | 44  |
| LAC17  | 17 | PQPAFGITRHYTLEIKM-----QNVTRLCHTKSLVSVNGQFPGPKLIAREGDQVLIKVVNQ-VPNN-     | 76  |
| AO     | 28 | SVLCQGGKIRFKWEVKY-----EFKSPDCFEKLIVITINGKFPGPTIKAQQGDTIVVELKNSFMTEN-    | 88  |
| LPR1   | 61 | GIIKPAASLQIGMFSTKWKFHRDLPATPVFAYGTSRSKATV---PGPTIETVYGVDTYVTVWRNH-LPKSH | 125 |
| LPR2   | 63 | GFLKPKSLHIGMEFFKKWKFHRDLPATPVFAYGTSKRSATV---PGPTIEAVYGVDTYVTVWRNH-LPLHH | 127 |

|        |     |                                                                      |     |
|--------|-----|----------------------------------------------------------------------|-----|
| ScFET3 | 77  | -----TSMHFGHLEFNGTASMDGVPFLTQCPIAPGSTM---LYNFTVDYNVGTYY              | 125 |
| LAC1   | 80  | -----TTIHWHGRLQYRTGWADGPAYITQCPIRSKQSY---TYRFKVEDQRGTLWW             | 128 |
| LAC2   | 81  | -----ISIHWHGRLRSGWADGPSYVTQCPIRMGQSY---VYNFTVTGQRGTLWW               | 129 |
| LAC3   | 79  | -----ISIHWHGRLRLNPWADGPEYITQCPIRPGQTY---TYRFKIEDQEGTLWW              | 127 |
| LAC4   | 78  | -----VSIHWHGVQRVRTGWADGPAYITQCPIQPGQVY---TYNYTLTGQRGTLWW             | 126 |
| LAC5   | 80  | -----ITIHHWHGVQMRRTGWADGPEFVTQCPIRPGSSY---TYRFTIQGQEGTLWW            | 128 |
| LAC6   | 83  | -----TTIHWHGIGKQRSCWYDGPSYITQCPIQSGQSF---TYNFKVAQKGTFLW              | 131 |
| LAC7   | 77  | -----ITIHHWHGIFHKLTVWADGPSMITQCPIQPGQRY---AYRFNITGQEGTLWW            | 125 |
| LAC8   | 79  | -----VTIHWHGVFQLKSVWMDGANMITQCPIQPGYNF---TYQFDITGQEGTLWW             | 127 |
| LAC9   | 79  | -----VTIHWHGVFQLKSVWMDGANMITQCPIQPSNNE---TYQFDITGQEGTLWW             | 127 |
| LAC10  | 76  | -----VSIHWHGIRQLRTGWADGPAYITQCPIKPGHSY---VYNFTVTGQRGTLWW             | 124 |
| LAC11  | 77  | -----MSIHWHGRLQYRNGWADGPAYITQCPIQTGQSY---LYDFNVTGQRGTLWW             | 125 |
| LAC12  | 78  | -----ITIHHWHGVQRIRTGWADGPEFVTQCPIRPGKSY---TYRFTIQGQEGTLWW            | 126 |
| LAC13  | 75  | -----ISLHWHGIRQMRNPWADGPEYITQCPIQPGGSY---TYRFTMEDQEGTLWW             | 123 |
| LAC14  | 87  | -----ITLHWHGARQIRNPWSDGPEYITQCPIRPGESY---VYRIDLKVEEGTLWW             | 135 |
| LAC15  | 73  | -----ITMHHWHGVQPRNPWSDGPEYITQCPIRPGSDF---LYKVFISIEDTTVWW             | 121 |
| LAC16  | 44  | -----VSIHW-----TGWADGPAYITQCPIQPGQNY---LHNFTITGQRGTLWW               | 85  |
| LAC17  | 76  | -----ISLHWHGIRQLRSGWADGPAYITQCPIQTGQSY---VYNFTVTGQRGTLWW             | 124 |
| AO     | 88  | -----VAVHWHGIRQIGTPWFDGVEGVITQCPILEGEVF---IYQFVVD-RPGTYM             | 135 |
| LPR1   | 126 | ILPWDPTISPATPKHGGIPTVVHLHGGIHEPTSDGNADAWFTAGFRETGPKWTKTTLHYENKQOPGNM | 195 |
| LPR2   | 128 | ILPWDPTISPAPKHGGIPTVVHLHGGIHEPTSDGNADSWFTAGFKETGSKWTKKTTTHYVKNQOPGNM | 197 |

|        |     |                                |                                                         |     |
|--------|-----|--------------------------------|---------------------------------------------------------|-----|
| ScFET3 | 126 | HSHTDQGYED---GMKGLFIKDDSPF     | YDYD-----EELSLSLSEWYHDL-VTDITKSFMSVYN                   | 180 |
| LAC1   | 129 | HAHHSWQ-RAS---                 | VYGAFLIYPR--QP-YPFS-GSHIQ--SELPILIGEWVND--VDNVEKAMMK--- | 183 |
| LAC2   | 130 | HAHIQWM-RAT---                 | VYGPLIILPKLHQP-YFPF-KPY---KQVPILFGEWFNAD-PQAVVQQAALQ--- | 184 |
| LAC3   | 128 | HAHSRWL-RAT---                 | VYGALIIYPRIGSE-YPFS-MPK---RDIPILIGEWVDRN-PMDVLKQAQF---  | 182 |
| LAC4   | 127 | HAHILWL-RAT---                 | VYGALVILPKRGVP-YFPF-KPD---NEKVIVLGEWVKSD-TENINEALK---   | 181 |
| LAC5   | 129 | HAHSSWL-RAT---                 | VYCSLLVFPPACSS-YPFT-KPH---RNVPLILGEWVDAN-PVDVLRRESIR--- | 183 |
| LAC6   | 132 | HAHFSWL-RAT---                 | VYGPLIVYPKASVP-YPFK-KPF---NEHTILLGEVWLKN-VVELEQHVLE---  | 186 |
| LAC7   | 126 | HAHASFL-RAT---                 | VYGALVIRPKSGHS-YFPF-KPH---KEVPILFGEWVNTD-VVALEEAIA---   | 180 |
| LAC8   | 128 | HAHVNNL-RAT---                 | LHGALVIRPRSGRP-YFPF-KPY---KEVPILFQQWWDTD-VRLIQ-----     | 177 |
| LAC9   | 128 | HAHVNNL-RAT---                 | IHGALVIRPRSGRP-YFPF-KPY---KEVPLIFQQWWDTD-VRLLE-----     | 177 |
| LAC10  | 125 | HAHVLWL-RAT---                 | VHGALVILPKLGLP-YFPF-KPH---REEVILIGEWVKSD-TETVINEALK---  | 179 |
| LAC11  | 126 | HAHILWL-RAT---                 | VYGAFLILPAPGKP-YFPF-QPY---QESNIIIGEWVNDK-VETAVNQANQ---  | 180 |
| LAC12  | 127 | HAHSSWL-RAT---                 | VYGALIIHPTPGSS-FPFP-KPD---ROTALMLGEWVNDAN-PVDVINQATR--- | 181 |
| LAC13  | 124 | HAHSRWL-RAT---                 | VYGALVIRPPLSSPHYFPFVLPK---REITLLIGEWVDRN-PMDVLNLQAQF--- | 180 |
| LAC14  | 136 | HAHSQWA-RAT---                 | VHGAFIVYPKRGSS-YFPF-KPH---REIPLILGEWVKKENIMHIPGKANK---  | 191 |
| LAC15  | 122 | HAHSSWT-RAT---                 | VHGLIFVYPRPPQI-LPFP-KAD---HEVPILIGEWVKRD-VREVVEEFVR---  | 176 |
| LAC16  | 86  | HAHILWL-RAT---                 | VHGALVILPKLGVF-YFPF-KPY---KEKTIVLSEWVKSD-VEELINEASR---  | 140 |
| LAC17  | 125 | HAHISWL-RST---                 | VYGPLIILPKRGVP-YPFA-KPH---KEVPMIFGEWFNAD-TEALIRQATQ---  | 179 |
| AO     | 136 | HSHYGMQ-RES---                 | GLIGMIQVSPAPTEP-EPFT-YDY---DRNFLITDQVHKS---MSEKATG---   | 187 |
| LPR1   | 196 | HDHAMGLTRVNLLAGLVGAYILRHHAVES- | PFQ-LETGDEFDRPLIIFDRSFRKD-GSIYMNA-----                  | 255 |
| LPR2   | 198 | HDHAAGLTRVNLLAGLLGSYILRHSSVES- | PLR-LPTGREFDRPLVIFDRSFRKD-GSIYMNA-----                  | 257 |

|        |     |                     |                                                       |     |
|--------|-----|---------------------|-------------------------------------------------------|-----|
| ScFET3 | 181 | PTGAPF-----         | IPQNLIVNNTMN-----LTWEVQPDITYLL                        | 211 |
| LAC1   | 183 | TGAGAK-----         | VSDAYTLNGLPGPLYPCSKDT-----FTATVDAGKTYLL               | 224 |
| LAC2   | 184 | TGAGPN-----         | ASDAHTFNGLPGLYNCSKDT-----YKLMVKPGKTYLL                | 225 |
| LAC3   | 182 | TGAAAN-----         | VSDAYTINGQPGDLYRCSRAGT-----IRFPIFFGETVOL              | 223 |
| LAC4   | 181 | SGLAPN-----         | VSDSHMINGHPGPVRNCPSSQG-----YKLSVENGKTYLL              | 221 |
| LAC5   | 183 | TGGAPN-----         | NSDAYTINGQPGDLYKCSSQDT-----TVVPINVGETILL              | 224 |
| LAC6   | 186 | SGGPPP-----         | PADAFTINGQPGPNYNCSKDV-----YEIQIVPRKIYLL               | 227 |
| LAC7   | 180 | TGVPPN-----         | NSDAYTINGPCNLYPCKSDRM-----FSLNVVKGKRYLL               | 221 |
| LAC8   | 177 | LRPAP-----          | VSDAYLINGLAGDSYPCSENRM-----FNLKVVQGKTYLL              | 217 |
| LAC9   | 177 | LRPAP-----          | VSDAYLINGLAGDSYPCSKNRM-----FNLKVVQGKTYLL              | 217 |
| LAC10  | 179 | SGLAPN-----         | VSDAHVINGHPGFVPNCPSSQGN-----FKLAVESGKTYML             | 220 |
| LAC11  | 180 | LGAPPP-----         | MSDAYTINGKPGPLFPCSEKHT-----FVIEAEAGKTYLL              | 221 |
| LAC12  | 181 | TGAAPN-----         | ISDAYTINGQPGDLYNCSKDET-----VVVPINSGETSLL              | 222 |
| LAC13  | 180 | TGAAPN-----         | ISDAYTINGQPGDLYRCSQDET-----LRFLVSGSEIVLL              | 221 |
| LAC14  | 191 | TGGEPN-----         | ISDSYTINGQPGYLYPCSKPET-----FKITVVRGRRYLL              | 232 |
| LAC15  | 176 | TGGAPN-----         | VSDALTINGHPGFLYPCSKSDT-----FHLTVGKGTYRI               | 217 |
| LAC16  | 140 | ICTAPS-----         | ASDAHTINGHSGSISNCPSSQS-----YGLPVRAGKTYML              | 181 |
| LAC17  | 179 | TGGGPN-----         | VSDAYTINGLPGLYNCSAKDT-----FRLRVKPGKTYLL               | 220 |
| AO     | 187 | LASIPF---KWVG--     | EPQSLMIQGRG--RFNCSSNLTTPPSLVSGVCNVSADCSRFLITVIPGKTYRL | 249 |
| LPR1   | 255 | TGNNPSIHQWQPEYFGD   | VIIVNGKAWPRLN-----VRRRKRYF                            | 294 |
| LPR2   | 257 | TGNNPTIHPQWQPEYFGDA | IIIVNGKAWPRLT-----VRRRKRYF                            | 296 |

|        |     |                                                                          |                                             |     |
|--------|-----|--------------------------------------------------------------------------|---------------------------------------------|-----|
| ScFET3 | 212 | RIIVNVGGFVSQ-YFWIEDHEMTVVEIDGITT-EKNVTDMLYITVAORYTVLVHTKND-TDKNFAIMQK--  | 276                                         |     |
| LAC1   | 225 | RIINAALNDEL-EFVAVANHTLTVVEVDVAVYT-KPVHTKAIMIAPGQTTLLLRADQL-SGGEFLIAAT--  | 289                                         |     |
| LAC2   | 226 | RIINAALNDEL-EFTIANHTLTVVEADACYV-KPEFTNIVLLGPGOTTNVLLKTKPIYPNATFYMLAR--   | 291                                         |     |
| LAC3   | 224 | RVINAGMNOEL-FFSVANHQTFTVVEDSAYT-KPFTTNVIMIGPGOTTNVLLTANQR-PG-RYYMAAR--   | 287                                         |     |
| LAC4   | 222 | RLVNAALNEEL-FFKVACHIFTVVEVDVAVYV-KPEKTDVLIAPGOTTNVLLTASKS-AG-KYLVTAS--   | 285                                         |     |
| LAC5   | 225 | RVINSALNDEL-FFTIVANHKLTVVGADASYL-KPFTTNVIVLGPQOTTDVLLITGDQP-PN-RYYMAAR-- | 288                                         |     |
| LAC6   | 228 | RIINAGINMET-FFTIANHRLTIVEVDGEYT-KPYTTERVMLVPGQTMNLTADQT-VG-RYSMAMG--     | 291                                         |     |
| LAC7   | 222 | RIINAAMNDEL-FFKIANHRLTVVAADVAVYT-APYVTDVIVIAAPGOTIDALLEADQS-VDTSYYMAAH-- | 286                                         |     |
| LAC8   | 218 | RIINAALNDEL-FFKIANHNTTVVAVDVAVYS-TPYLTDMVILTPGOTVDALLTADQA-IG-KYYMATL--  | 281                                         |     |
| LAC9   | 218 | RIINAALNDEL-FFKIANHNTTVVAVDVAVYT-TPYLTDMVILTPGOTIDALLTADQP-IG-TYYMAII--  | 281                                         |     |
| LAC10  | 221 | RIINAALNEEL-FFKIAHRTFTVVEVDVAVYV-KPFNTDTILIAPGOTTALVSAARP-SG-QYLIAAA--   | 284                                         |     |
| LAC11  | 222 | RIINAALNDEL-FFGIAGHNMTVVEIDVAVYT-KPFTTKAILLGPQOTTNVLLKTDPS-PN-RYFMAAS--  | 285                                         |     |
| LAC12  | 223 | RVINAALNDEL-FFTIVANHKLTVVGADASYL-KPFTTKVLMVLPQOTTDVLLTADQP-PK-RYYIAAR--  | 286                                         |     |
| LAC13  | 222 | RVINSALNDEL-FFGVANHKLTVVAADASYT-KPFTTNVIMLGPQOTTDVLLTADQP-PA-HYYMAAH--   | 285                                         |     |
| LAC14  | 233 | RIINAVMDEL-FFAIANHTLTVVAKDGYL-KHFKSDYLMITPGQSMVDVLLHANQR-PN-HYFVAAR--    | 296                                         |     |
| LAC15  | 218 | RMVNAAMNDEL-FFAIANHSLTVVSADGHYI-KPIKATYITISPGETLDMLLHADQD-PERTYYMAAR--   | 282                                         |     |
| LAC16  | 182 | RIINAALNEEL-FFKIAHVLTVVEVDVAVYT-KPYKTDVFIAPGOTTNVLLTANAN-AGSNYMVAAT--    | 246                                         |     |
| LAC17  | 221 | RIINAALNDEL-FFSIANHTVTVVEADAIYV-KPEFTETILIAPGOTTNVLLKTKSSYPSAFFMTAR--    | 286                                         |     |
| AO     | 250 | RIISLTALSAL-SFOIEGHNTLVVEADGHYV-EPFTVKNLFVYSCETYSVLLKADQN-PRRNYWITSSIV   | 316                                         |     |
| LPR1   | 295 | RIINASNARFFKFFFSNGLDFIVVGS                                               | SAYLSKPMVTKSILLSPEIVDVVDFYKS-PSRTVVLANDAP   | 363 |
| LPR2   | 297 | RIINASNARFFRFFFSNGLDFIVVGS                                               | SAYLAKPVSTKSIVLLAPSEIVDVVDFSKS-TSKTAILANNAP | 365 |

**ScFET3** 276 -----FDDTMLVIPSDDLQLNATSY-----MVYNK-TAALPTQNYVDSIDNFL**DD** 320  
**LAC1** 289 -PYVTS-VFP--FNNST---TVGFIRYTGKTKPENSVNTRRRRLTAMST-VVALPNMLDTKFAATKFSDS 351  
**LAC2** 291 -PYFTG-QGT--IDNTT---VAGILOQYQHHTKS-----SKNLSII-KPSLPPINSTSYAANFTKM 343  
**LAC3** 287 -AYNSA-NAP--FDNTT---TTAILQYVNPATRRGRG-----RGQIAPV-FVVLPGFNDTATATAFTNR 343  
**LAC4** 285 -EFMDA-PIA--VDNVT---ATATVHYSGTLS-----SSPTI-LTLPPPPONATSIANNFTNS 334  
**LAC5** 288 -AYQSAQNAP--FGNTT---TTAILQYKSAPCCGVGGSGTKKGNSEFKPI-METLPAYNTNTVTFSQS 351  
**LAC6** 291 -PYESAKNVK--FQNTS---AIANFOYIGALP-----NNVTV-PAKLPIFNNDIAVKTVMVG 341  
**LAC7** 286 -PYASAPAVP--FPNTT---TRGVIHYGGASK-----TGRSKPVLMPKLPSEFFDTLTAYRFYSN 339  
**LAC8** 281 -PYISAIGIP-TPDIKP---TRGLIVYQGATS-----SSSPA-EPLMPVPNDMSTAHRTSN 332  
**LAC9** 281 -PYFSAIGVPASPDTKP---TRGLIVYEGATS-----SSSPT-KPWWPPANDIPTAHRTSSN 333  
**LAC10** 284 -EFQDSAVVA--VDNRT---ATATVHYSGTLS-----ATPTK-TTSPPPPONATSVANTFVNS 334  
**LAC11** 285 -EFMDA-PVS--VDNKT---VTAILQYKGVPN-----TVLPI-LPKLPLPNDTSFALDYNKG 334  
**LAC12** 286 -AYQSAQNAP--FDNTT---TTAILQYKKTIT-----TSKPI-MPVLPAFNDTNTVTSFSRK 336  
**LAC13** 285 -AYNSA-NAA--FDNTT---TTAILKYKDASCVTILQA-----KSQARAI-PAQLPGFNDTATAAFTAQ 341  
**LAC14** 296 -AYSSAFGAG--FDKTT---TTAILQYKGDTL-----NRIKPI-LPYLPYNTREASTRTFNQ 347  
**LAC15** 282 -AYQSG-NID--FNNST---TIGILSYTSSCKAK-----TSSFSGY-YETLPFYNDTSAAFGFFTK 335  
**LAC16** 246 -TFTDA-HIP--YDNVT---ATATLHYIGHTSTV-----STSCKTV-LASLPPONATWVATKFSNR 299  
**LAC17** 286 -PYVTG-QGT--FDNST---VAGILEYEPKQTKGAHSRTS--IKNLQLF-KETLPALNDTNPATKFSNK 346  
**AO** 316 -----SRP--ATTPP---ATAVLNYPNHPRR-----RPPTSES-SNIVPEWNTFR--SRLAQ 362  
**LPR1** 364 YPYPSGDPVN--EENGK--VMKFIINNESEDD-----TCTIPKKLINYPNADVSNVAVLTRYISM 418  
**LPR2** 366 YPYPSGDPVT--EENSK--VMKFIINNKSEVD-----TSIIPKKLIEYPPAHVSTSTRTRYIAM 420

**ScFET3** 321 FYLQPY----EKEAIYGEPDHVITVDVMDNLK-----NGVN-YAFFNNITYTAPKV-PTLMT 372  
**LAC1** 352 IKSILGSAKYCKVPTKIDKRVIITISLNLQDCP---LNQTCQGY-AGKRFFASMNNISFVREPI-SILES 416  
**LAC2** 344 FRSLASSTFPANVPKVVDKQYFFAIGLGTNPCLP---KNQTCQGPNTTKFAASINNVSFILPNKTSLLQS 410  
**LAC3** 344 LRYWKR----APVPQQVDENLFFTVGLGLINCANP-NSPRCQGP-NGTRFAASMNNMSFVLPERSNSVMOA 407  
**LAC4** 335 LRSLSNKKYPALVPTTIDHHLFFTVGLGLINACP-----TCKAG-NGSRVVASINNVTFIMPKT-ALLPA 396  
**LAC5** 352 FRSLRR----AEVPTIEDENLFVTIIGLGLNNCPKNFRSRRCQGP-NGTRFTASMNNVSFAIPSNYSLLQA 416  
**LAC6** 342 LRSLSNA----VDVPRNIDAHLEITIGLVNKNKSENPNKNCQGP-RKGRLAASMNNISFIEPKV-SILEA 405  
**LAC7** 340 LTAIVNGPHWVPVPRYVDEEMLVTIIGLGLACAA--DN TTC-----PKFSASMSNHSFVLPKKLSILEA 400  
**LAC8** 333 ITSLVGGPHWTFVPRHVDEKMFITMGLGLDPCP---AGTKCIGP-LGQRYAGSINNRTFMIPERISMQEA 398  
**LAC9** 334 ITSLVGGPHWTFVPRHVDEKMFITMGLGLDPCP---SNAKCVGP-LDQRLAGSINNRTFMIPERISMQEA 399  
**LAC10** 335 LRSLSNKTYPANVPITVDHLLFTVGLGLINRCH-----SCKAG-NFSRVVAAINNITFKMPKT-ALLQA 396  
**LAC11** 335 LKSLNTPNFPALVPLKVDRLFYTIIGLGINACP-----TCV---NGTNLAASINNITFIMPKT-ALLKA 394  
**LAC12** 337 FKSLRN----VVVPTIDENLFFTVGLGLDNCPPKPKSRCQGL-NGTRFTASMNNVSFVLPNSFSLQA 401  
**LAC13** 342 MKSPSK----VKVPLEIDENLFFTVGLGLFNCPTP-NTQRCQGP-NGTRFTASINNVSFVIEPKQNSIMQA 405  
**LAC14** 348 FRSQRP----VNVPVKINTRLLYAISVNLNMCN---DDRPTGTP-FGKRFSSSINNISFVNPSV-DILRA 408  
**LAC15** 336 IKCLFS----GOVPVQISRRIITTVSINLRMCP---QN-SCGEP-NGSRLAASMNNISFVTPSHVDILKA 396  
**LAC16** 300 LRSLSNLEYPARVPTTVEHSLFFTVGLGANPCQ-----SCN---NGVRLVAGINNVTFTMPKT-ALLQA 359  
**LAC17** 347 LRSLSNKNFPANVPLNDRKFFFTVGLGTNPONHK-NNQTCQGPNTTMTFAASISNISFTMPKT-ALLQS 414  
**AO** 363 LAIKARRGFIALPENSQKIVL---LNTQNEV-----NGYR-RWVNNVSVYHHPKT-PYLIA 415  
**LPR1** 419 YEYVSN----SDEPHTL-----LVNGLPYEAPVT----- 443  
**LPR2** 421 FEYVSS----IDEPHTL-----YINGLPYNAPVT----- 445

**ScFET3** 373 VLSSGD-----QA-NNSEIYGSNTHTFILEKDEIVEIVLNNQDT----- 410  
**LAC1** 417 YYKKQSKGVFSLDFPEKPPNRFEDFTG--VDPV---SENMNTEFGTKLFEVEFGSRLEIVFOCTSFNLIE- 480  
**LAC2** 411 YFVGKSKNVFMTDFPTAIIPIFNNTG--TPP-----NNTMVSRTGKVVVLKYKTTVELVLQGTSLIGIE- 472  
**LAC3** 408 YYQGTG-GFTTDFPPVPVQFDYTG---NVS---RGLWQPIKGTAKYKLYKYSNVQIVLQDTSIVTPE- 469  
**LAC4** 397 HYFNIS-GVFTTDFPKNPPHVENYSG--GSV-----TNMATETGTRLYKLPYNATVQLVLQDTCVIAPE- 457  
**LAC5** 417 HHHGIP-GVFTTDFPAKPPVKEDYTG--NNIS---RSLYQPDRTGKLYKLYGSRVQIVLQDTSIVTPE- 479  
**LAC6** 406 YYKQLE-GVFTLDFPPTPEKAYDFVNGAPNDI---ANDTQAANGTRAIVFEYGSRIQIIFONTGTLTTE- 470  
**LAC7** 401 VFHDVK-GIFTADFPDQPPVKFDYTN---PNVTQTNPGLLFTQKSTSAKILKFNNTVEIVLQNHALIAE- 466  
**LAC8** 399 YFYNIS- IY **DD** NQ LK KFEQR-TNNDMKMMFPERKTSVKKIRENSTVEIVLQNTAIISPE- 465  
**LAC9** 400 YFYNIT-GVYTDLFPDQPELKFDFTKFEQHPTNSDMMMFPERKTSVKTIRESNSTVEIVLQNTGILTPE- 467  
**LAC10** 397 HYFNIT-GLYTTDFPAKPRRVFEDFTG--KPP-----SNLATMKATKLYKLPYNSTVQVVLQDTCNVAPE- 457  
**LAC11** 395 HYSNIS-GVFTTDFPDRPKAFNYTG--VPLT-----ANLGTSTGTRLSRVKENTTIELVLQDNTLLTVE- 456  
**LAC12** 402 HSNGIP-GVFTTDFPKPPVKEDYTG--NNIS---RALFQPVKGTAKYKLYKYSRVQVVLQDNTIVTSE- 464  
**LAC13** 406 YYQGTPTGVFTTDFPPTPPVTFDYTG---NVS---RGLWQPTRGTAKYKLYKYSRVQVVLQDTSIVTTE- 468  
**LAC14** 409 YYRHIG-GVYQEDFPRNPPTKENYTG--ENLP-----FPTRFGTKVVVLQDYNSSVELILOQTTVWASN- 468  
**LAC15** 397 YYYHIK-GVYGRFPEFPPLIFNFTA--ENQP---LFLETPLRLATEVKVIEFGQVVELVLQGTSLVGGG- 459  
**LAC16** 360 HFFNIS- **DD** AK SNPY A--PVKL---GVNAATMKGTAKLYRLPYNATVQIVLQNTAMILSD- 422  
**LAC17** 415 HYSQSGHGVYSPKFPWSPVFPENYTG--TPP-----NNTMVSNGTNLMVLPYNTSVELVMDQDTSILGAE- 476  
**AO** 416 LKQNLN-NAFDWRE--TAFENYDSRN--YDIFAK-PLNANATSDGIYRLRFNSTVIVILQNTAMTNANN 479  
**LPR1** 443 -----ETPKSGT-----TEVWEVIN-----LTED- 462  
**LPR2** 445 -----ETPKIGT-----SEVWEVIN-----LTED- 464

|        |     |                                                                         |     |
|--------|-----|-------------------------------------------------------------------------|-----|
| ScFET3 | 410 | -GTHPFHLHGHAFTQIQDRRTYDDALGEVPHSEF-----PDNHP-AFPEY--PMR--RDTLVVRPQSN--- | 467 |
| LAC1   | 480 | --NHPLHVLHGHNFFVV-----GRGFGNFD-----PEKDP-KRYNLVDPE--RNTFAVPTGGW---      | 528 |
| LAC2   | 472 | --AHPIHLHGHNFFVV-----GQGFNFN-----PARDP-KHYNLVDPE--RNTINIPSGGW---        | 520 |
| LAC3   | 469 | --NHPMHLHGYNFFVV-----GSGFGNFN-----PRTDP-ARFNLFDPPE--RNTIGTEPPGGW---     | 517 |
| LAC4   | 457 | --NHPVHLHGHNFFEV-----GRGLGNFN-----STKDP-KNFNLVDPE--RNTIGVPSGGW---       | 505 |
| LAC5   | 479 | --NHPIHLHGYNFFII-----AEGFGNFN-----PKKDT-AKFNLDPPE--RNTVGVPVNGW---       | 527 |
| LAC6   | 470 | --NHPIHLHGHSFYVI-----GYGTGNFD-----QQT-AKFNLDPPE--LNTIGVPPGGW---         | 516 |
| LAC7   | 466 | --SHPMHLHGHNFFVL-----AQGFNYD-----PSRDR-SKLNLDVPS--RNTLAVPPGGW---        | 514 |
| LAC8   | 465 | --SHPMHLHGHNFFVL-----CYGFGNYD-----PIRDA-RKLNLFNPQM--HNTVGVPVGGW---      | 513 |
| LAC9   | 467 | --SHPMHLHGHNFFVL-----CYGFGNYD-----PIRDA-RKLNLFNPQM--HNTVGVPVGGW---      | 515 |
| LAC10  | 457 | --NHPIHLHGHNFFVV-----GLGTGNYN-----SKKDS-NKFNLVDPE--RNTVGVPVGGW---       | 505 |
| LAC11  | 456 | --SHPFHLHGHNFFVV-----GTGVGNFD-----PKKDP-AKFNLVDPE--RNTVGVPVGGW---       | 504 |
| LAC12  | 464 | --NHPIHLHGYNFFIV-----GEGFGNFN-----PKKDT-SKFNLDVPE--RNTVAVPVNGW---       | 512 |
| LAC13  | 468 | --NHPMHLHGYNFFVV-----GTGVGNFN-----PNTDT-SSFNLDPPR--RNTIGTEPPGGW---      | 516 |
| LAC14  | 468 | --IHPIHLHGYNFFVV-----GSGFGNFD-----RRKDP-LRYNLVDPE--ETTGVVERNGW---       | 516 |
| LAC15  | 459 | -LDHPMHLHGHSFYVV-----GVGFGNYN-----ISEEDPSSRYNLYDPPY--KNTMTVVERNGW---    | 510 |
| LAC16  | 422 | --NHPFHLHGHNFFEV-----GRGLGNFN-----PEKDP-KAFNLVDPE--RNTVGVPVGGW---       | 470 |
| LAC17  | 476 | --SHPMHLHGHNFFVV-----GQGFNFN-----PNKDP-RNFNLVDPE--RNTVGVPVGGW---        | 524 |
| AO     | 480 | SETHPWHLHGHDFFVL-----CYGEGKFN-----ESEDV-KRYNRVDPIK--KNTVAVQPPGW---      | 529 |
| LPR1   | 462 | --NHPLHLHLGLFKVVEQTAL---LAAGLEEFKECMTKQNDV-KKQISKYARGKKTAVTAHERGWKNV    | 525 |
| LPR2   | 464 | --NHPLHLHLGLFKVLEQTAL---VKS---EEFIECMTKRNDV-VKCEISKYARGNKTAFTVHERGWKNV  | 525 |

|        |     |                                                                    |     |
|--------|-----|--------------------------------------------------------------------|-----|
| ScFET3 | 467 | -----FVIRFK-----ADNPGVWFHCHIEWELLOGLGLVLVEDPFGIQDAHSQQLS-          | 514 |
| LAC1   | 528 | -----AAIRIN-----ADNPGVWFHCHLEQHTSWGLAMGFI-----VKDGPLPSQTL          | 571 |
| LAC2   | 520 | -----VAIRFL-----ADNPGVWLMHCHIEHLSWGLTMAV-----VLDGDLNPQKL           | 563 |
| LAC3   | 517 | -----VAIRFV-----ADNPGVWFMHCHIDSLGWGLAMVFL-----VENGRGQLOSV          | 560 |
| LAC4   | 505 | -----VVIRFR-----ADNPGVWFMHCHLEVHTTWGLKMAFL-----VENGKGPNSI          | 548 |
| LAC5   | 527 | -----AVIRFI-----ADNPGVWIMHCHLDALISWGLAMAF-----VENGNGLVQTI          | 570 |
| LAC6   | 516 | -----AAIRFV-----ANNPGLWLLHCHFDIHTWGMSTMTFI-----VKNGKKVQESL         | 559 |
| LAC7   | 514 | -----AVIRFT-----ANNPGVWLFHCHIDVLPFGGLGMIFV-----VKNGPTKSTTL         | 557 |
| LAC8   | 513 | -----VVLRFI-----ANNPGVWLFHCHMDALPYGIMSATFI-----VONGPTPETS          | 556 |
| LAC9   | 515 | -----VVLRFI-----ANNPGVWLFHCHMDALPIGIMMAFI-----VONGPTRETS           | 558 |
| LAC10  | 505 | -----AAIRFR-----ADNPGVWFMHCHLEVHTTWGLKMAFL-----VENGKGPNSI          | 548 |
| LAC11  | 504 | -----AAIRFR-----ADNPGVWFMHCHLEVHTTWGLKMAFV-----VENGETPELSV         | 547 |
| LAC12  | 512 | -----AVIRFV-----ADNPGVWLMHCHLDVHIKWLGLAMAF-----VDNGVGELET          | 555 |
| LAC13  | 516 | -----VAIRFV-----ANNPGVWLMHCHIDSLFWGLAMVFL-----VENGEHGLQSV          | 559 |
| LAC14  | 516 | -----TAVRFV-----ANNPGVWLLHCHIERHATWGMNTVFI-----VKDGPTKSSRM         | 559 |
| LAC15  | 510 | -----TAIRFV-----ADNPGVWFMHCHLDRLHTWGMNVVFI-----VKNGREPNOQI         | 553 |
| LAC16  | 470 | -----TAIRFI-----ADNPGVWFMHCHLEVHTTWGLKMAFV-----VDNGHGPDOQL         | 513 |
| LAC17  | 524 | -----TAIRFL-----ADNPGVWFMHCHLEVHTSWGLRMAWL-----VLDGDKPDQKL         | 567 |
| AO     | 529 | -----TAIRFR-----ADNPGVWSEFHCHIESHFFMGMGIVF-----ESGIDKVS            | 570 |
| LPR1   | 526 | FKMMPGHVTRILVRFYSYIHTNASYPFDPTQEPG-YVYHCHILDEEDNMMMRPLKV---II----- | 581 |
| LPR2   | 526 | FKMMPGHVTKILVRFYSYIHSNESYSFDTQEPG-YVYHCHILDEEDNMMMRPLAM---VL-----  | 581 |

|        |     |                                                                       |     |
|--------|-----|-----------------------------------------------------------------------|-----|
| ScFET3 | 514 | ---ENHLEVQSCSVATEGNAAANTLDLTDLTGENVQHAFIPTGFTKKGIIAMTFSCFAGILGIITIAIY | 581 |
| LAC1   | 572 | LPPPHDLFQC-----                                                       | 581 |
| LAC2   | 564 | LPPPSDFPKC-----                                                       | 573 |
| LAC3   | 561 | QAPPDLPLRC-----                                                       | 570 |
| LAC4   | 549 | LPPPKDLPKC-----                                                       | 558 |
| LAC5   | 571 | EQPPHDLFVC-----                                                       | 580 |
| LAC6   | 560 | PHPPADLPKC-----                                                       | 569 |
| LAC7   | 558 | PPPPDLPKC-----                                                        | 567 |
| LAC8   | 557 | PSPPSNLPQC-----TR-----                                                | 568 |
| LAC9   | 559 | PSPPSNLPQC-----TR-----                                                | 570 |
| LAC10  | 549 | RPPPSDLPKC-----                                                       | 558 |
| LAC11  | 548 | LPPPKDYFSC-----                                                       | 557 |
| LAC12  | 556 | EAPPHDLPIC-----                                                       | 565 |
| LAC13  | 560 | QSPPLDLFQC-----                                                       | 569 |
| LAC14  | 560 | VKPPPDLPSC-----                                                       | 569 |
| LAC15  | 554 | LPPPDLPFCY-----                                                       | 564 |
| LAC16  | 514 | LPPPADLPKC-----                                                       | 523 |
| LAC17  | 568 | LPPPADLPKC-----                                                       | 577 |
| AO     | 570 | ---PSSIMGC-----GQTKR-----                                             | 582 |
| LPR1   | 581 | -----                                                                 | 581 |
| LPR2   | 581 | -----                                                                 | 581 |

|               |     |                                                         |     |
|---------------|-----|---------------------------------------------------------|-----|
| <b>ScFET3</b> | 582 | GMMDMEDATEKVIRDLHVDPEVLLNEVDENEERQVNEDRHSTKHKQFLTKAKRFF | 636 |
| <b>LAC1</b>   | 581 | -----                                                   | 581 |
| <b>LAC2</b>   | 573 | -----                                                   | 573 |
| <b>LAC3</b>   | 570 | -----                                                   | 570 |
| <b>LAC4</b>   | 558 | -----                                                   | 558 |
| <b>LAC5</b>   | 580 | -----                                                   | 580 |
| <b>LAC6</b>   | 569 | -----                                                   | 569 |
| <b>LAC7</b>   | 567 | -----                                                   | 567 |
| <b>LAC8</b>   | 568 | -----DPTIY-----DSRTTNIDLS-----Y                         | 584 |
| <b>LAC9</b>   | 570 | -----DPTIY-----DSRTTNVDMS-----Y                         | 586 |
| <b>LAC10</b>  | 558 | -----                                                   | 558 |
| <b>LAC11</b>  | 557 | -----                                                   | 557 |
| <b>LAC12</b>  | 565 | -----                                                   | 565 |
| <b>LAC13</b>  | 569 | -----                                                   | 569 |
| <b>LAC14</b>  | 569 | -----                                                   | 569 |
| <b>LAC15</b>  | 564 | -----E                                                  | 565 |
| <b>LAC16</b>  | 523 | -----                                                   | 523 |
| <b>LAC17</b>  | 577 | -----                                                   | 577 |
| <b>AO</b>     | 582 | -----                                                   | 582 |
| <b>LPR1</b>   | 581 | -----                                                   | 581 |
| <b>LPR2</b>   | 581 | -----                                                   | 581 |

**Supplementary Figure 1. Amino acid sequence alignment of ScFET3 with Arabidopsis LMCO Oxidase family proteins and Ascorbate Oxidase.** Conserved histidine residues involved in Cu binding are highlighted in green, and aspartic acid residues that putatively correspond to those known to be essential for ferroxidase activity of ScFET3 are highlighted in red (D319, D320) or in pink (E185, D283, D409) (Bonaccorsi di Patti et al., 2005; Quintanar et al., 2007). ScFET3, 855080. LAC1, At1g18140. LAC2, At2g29130. LAC3, At2g30210. LAC4, At2g38080. LAC5, At2g40370. LAC6, At2g46570. LAC7, At3g09220. LAC8, At5g01040. LAC9, At5g01050. LAC10, At5g01190. LAC11, At5g03260. LAC12, At5g05390. LAC13, At5g07130. LAC14, At5g09360. LAC15, At5g48100. LAC16, At5g58910. LAC17, At5g60020. AO, At4g39830. LPR1, At1g23010. LPR2, At1g71040.
