# Supplementary material for: Involvement of Arabidopsis Multi-Copper Oxidase-Encoding LACCASE12 in Root-to-Shoot Iron Partitioning: A Novel Example of Copper-Iron Crosstalk
Source: Frontiers journal article supplement (doi:10.3389/fpls.2021.688318), 2021-10-11
Supplement: Data_Sheet_1.zip [file Data_Sheet_1.zip]

## Sheet: qRT-PCR primers
Supplementary Table 1. Primers used for real-time RT-PCR analysis.
Primer name	Primer sequence (5´ to 3´)
UBQ10-F	GGCCTTGTATAATCCCTGATGAATAAG
UBQ10-R	AAAGAGATAACAGGAACGGAAACATAGT
LAC12-F	AATGGTGGAATGCAAATCCG
LAC12-R	CGGTTCGAGTCGCTTGGTTA
FPN1-F	TTGCAAGATGGAGTGCCAGAAC
FPN1-R	AATGGCAGCGAGAAGCAGAGAG
FPN2-F	TGCTGCTTCTAGGCTTGGTTTG
FPN2-R	TCCTGCATTTGCTGGATTACCG
COPT2-F	CATTCACCGATCCTACGTGTCA
COPT2-R	CACCAAATACGAAAGGCCAGTC
IRT1-F	CCCCGCAAATGATGTTACCTT
IRT1-R	GGTATCGCAAGAGCTGTGCAT
bHLH39-F	CGTGACCGTCGCAGGAAAATTAAC
bHLH39-R	TCGCAGGAATGCTTAGCTTCTTCG
FRO2-F	ATTACCCGATCGACCACAACA
FRO2-R	TGCTCACGGAGATGACCAAGA
